# Supplementary material for: Anti-Helicobacter pylori xanthones of Garcinia fusca
Source: Springer Nature journal article supplement (doi:10.1007/s12272-013-0266-4), 2013-10-23
Supplement: MOESM2 [file 12272_2013_266_MOESM2_ESM.doc]

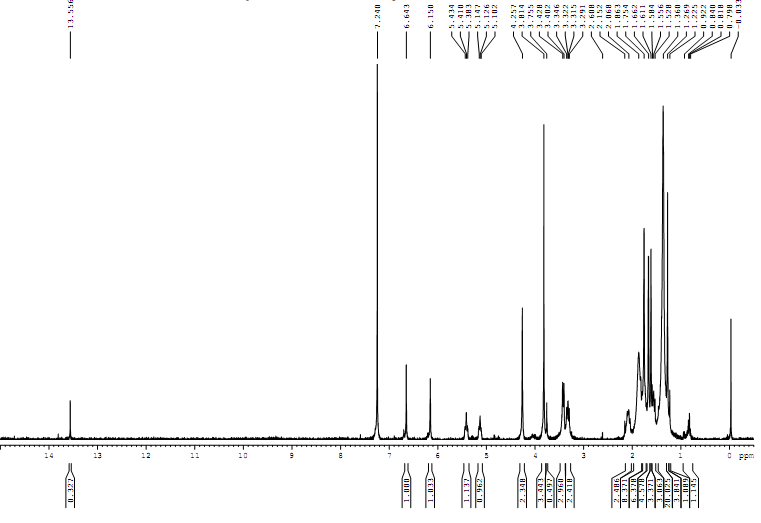


fuscaxanthone I

Figure 1. 1H-NMR spectrum of fuscaxanthone I (**1**) in CDCl3 + 2 drops CD3OD


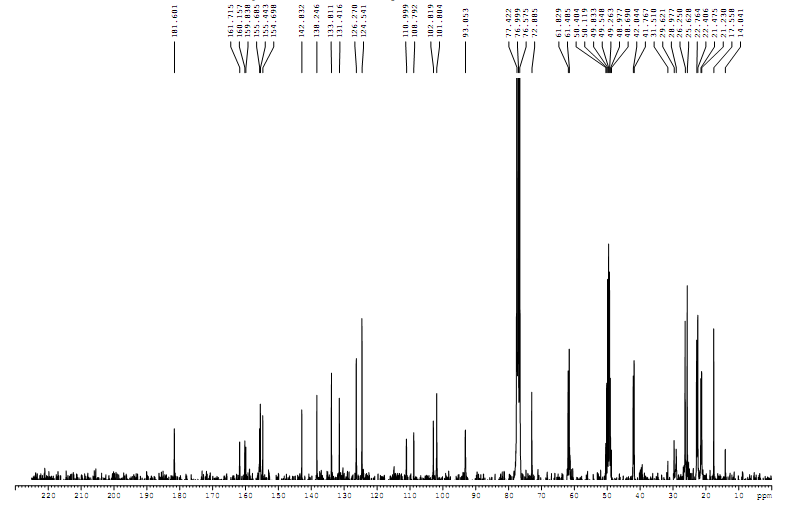


fuscaxanthone I


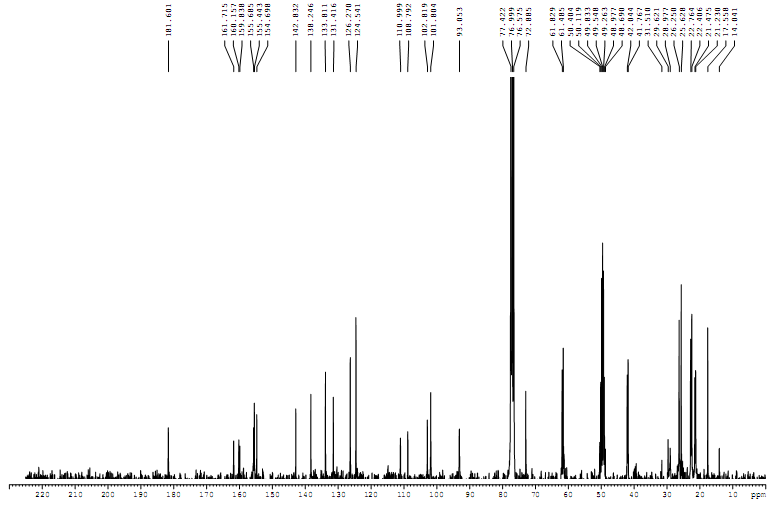
Figure 2. 13C-NMR spectrum of fuscaxanthone I (**1**) in CDCl3 + 2 drops CD3OD
